# Supplementary material
Source: PubMed Central journal article supplement (PMC3983352)
Supplement: jm401837e_si_001.pdf [file jm401837e_si_001.pdf]

## Supporting Information

### Mutagenesis Studies of the 14 Å Internal Cavity of Histone Deacetylase 1: Insights towards the Acetate Escape Hypothesis and Selective Inhibitor Design

Magdalene K. Wambua, Dhanusha A. Nalawansha, and Mary Kay H. Pflum\*

*Department of Chemistry, Wayne State University,*

*5101 Cass Avenue, Detroit, Michigan 48202*

#### Contents

|                                                                                             |             |
|---------------------------------------------------------------------------------------------|-------------|
| I. Primer sequences used in HDAC1 mutagenesis                                               | Page S2     |
| II. Deacetylase activity data for all HDAC1 mutants                                         | Page S3     |
| Table S1. Percent deacetylase activities for HDAC1 Y23A, Y24A, R34A and C151A mutants       |             |
| Table S2. Percent deacetylase activities for additional alanine mutants                     |             |
| Table S3. Percent deacetylase activities for substitution mutants                           |             |
| III. Acetate inhibition experimental data                                                   | Pages S4-S5 |
| Figure S1. Dose dependent curves for acetate competition experiments                        |             |
| Table S4. Percentage remaining HDAC activity after incubation of acetate with HDAC1         |             |
| Table S5. Percentage remaining HDAC activity after incubation of acetate with HDAC1 F205Y   |             |
| Table S6. Percentage remaining HDAC activity after incubation of acetate with HDAC1 Y23A    |             |
| Table S7. Percentage remaining HDAC activity after incubation of acetate with HDAC1 Y24A    |             |
| Table S8. Percentage remaining HDAC activity after incubation of acetate with HDAC1 R23A    |             |
| Table S9. Percentage remaining HDAC activity after incubation of acetate with HDAC1 R36A    |             |
| Table S10. Percentage remaining HDAC activity after incubation of acetate with HDAC1 C151A  |             |
| IV. Compound <b>1</b> experimental data                                                     | Page S6     |
| Table S11. Percentage remaining HDAC activity after incubation of <b>1</b> with HDAC1       |             |
| Table S12. Percentage remaining HDAC activity after incubation of <b>1</b> with HDAC1 S113A |             |
| IV. References                                                                              | Page S6     |

## I. Primer sequences used in HDAC1 mutagenesis

HDAC1 mutants were created in pBJ5HDAC1(1, 2) using the Not1 and ECOR1 restriction sites via a two step PCR using the following primer sequences (mutated codon is underlined, if present):

pBJ5 Not1 start, GCCAGAATGCGGCCGCATGGCGCAG;

pBJ5 153 rev, TATCATGTCTGGATCCGG;

HDAC1 V19A rev, CATCCCCGTCGTAGTAGTAACAGAC;

HDAC1 V19A for, GTTACTACTACGACGGGGATGCTGGAATTACTATTATGG;

HDAC1 Y23/Y24 rev, GTAATTTCCAACATCCCCG;

HDAC1 Y23A for, CGGGGATGTTGGAATTACGCATATGGACAAGGCCACCCAATGAAGCC;

HDAC1 Y23F for, CGGGGATGTTGGAATTACTTTCTTATGGACAAGGCCACCCAATGAAGCC;

HDAC1 Y23C for, CGGGGAT GTTGGAATTACTGTTATGGACAAGGCCACCCAATGAAGCC;

HDAC1 Y23H for, CGGG GATGTTGGAATTACCATTATGGACAAGGCCACCCAATGAAGCC;

HDAC1 Y23R for, CGGGGATGTTGGA AATTACCGATATGGACAAGGCCACCCAATGAAGCC;

HDAC1 Y24A for, CGGGGATGTTGGAATTACTATGCAGGACAAGGCCACCCAATGAAGCC;

HDAC1 Y24F for, CGGGGATGTTGGAATTACTATTTCGGACAAGGCCACCCAATGAAGCC;

HDAC1 M30A rev, GGCTTCATTGGGTGGCCTTGTCC;

HDAC1 M30A for, GGACAAGGCCACCCAGCGAAGCCTCACCGAATC;

HDAC1 R34A rev, GGCTTCATTGGGTGGCCTTGTCC;

HDAC1 R34A for, GGCCACCCAATGAAGCCTCACGCATCCGCATGACTCATAATTTGCTG;

HDAC1 R34K for, GGCCACCCAATGAAGCCTCACAAGATCCGCATGACTCATAATTTGCTG;

HDAC1 I35A rev: CGGTGAGGCTTCATTGGGTGG;

HDAC1 I35A for, CCCAATGAAGCCTCACCGAGCCCGCATGACTCATAATTTGCTGC;

HDAC1 R36A for, CCCAATGAAGCCTCACCGAATCGCCATGACTCATAATTTGCTGC;

HDAC1 R36K for, CCCAATGAAGCCTCACCGAATCAAAATGACTCATAATTTGCTGC;

HDAC1 F109A rev, CTCAAACAGGCCATCGAATACTGG

HDAC1 F109A for, CCAGTATTCGATGGCCTGTTTGAGCCTGTCAGTTGTCTACTGGTGG

HDAC1 S113A rev, CAACTGACAGAACTCAAACAGGCC;

HDAC1 S113A for, GGCCTGTTTGAGTTCTGTCAGTTGCAACTGGTGGTTCTGTGGC;

HDAC1 L139A rev, GCCCCCAGCCCAATTCACAGCG;

HDAC1 L139A for, GGGCTGGGGGCGGCACCATGCAAAGAAGTCCGAGGC;

HDAC1 C151A rev, GAAGCCAGATGCCTCGGACTTC;

HDAC1 C151A for, GTCCGAGGCATCTGGCTTCGCTTACGTCAATGATATC;

HDAC1 C151S for, GTCCGAGGCATCTGGCTTCCTTACGTCAATGATATC;

HDAC1 Y303A rev, CCACCGCCTCCCAGCATCAGC;

HDAC1 Y303A for, GGGAGGCGGTGGGCTCACCATTGTAACGTTGCCCGG;

HDAC1 Y303F for, GGGAGGCGGTGGTTTCACCATTGTAACGTTGCCCGG

## II. Deacetylase activity data for all HDAC1 mutants

**Table S1.** Percent deacetylase activities for HDAC1 Y23A, Y24A, R34A and C151A mutants<sup>a</sup>

| Sample          | Mean ± Error |
|-----------------|--------------|
| No protein      | 16 ± 4.4%    |
| HDAC1 H141A     | 20 ± 1.6%    |
| Wild Type HDAC1 | 100%         |
| HDAC1 Y23A      | 35 ± 7.3%    |
| HDAC1 Y24A      | 26 ± 5.8%    |
| HDAC1 R34A      | 31 ± 6.6%    |
| HDAC1 C151A     | 21 ± 4.6%    |

<sup>a</sup>The mean deacetylase activities for each mutant is a percent of the wild type (see to 100%) and the standard error of at least four independent trials is shown (Data displayed as a histograms in Figure 3A of the manuscript).

**Table S2.** Percent deacetylase activities for additional alanine mutants<sup>a</sup>

| Sample          | Mean± Error |
|-----------------|-------------|
| No protein      | 10 ± 1.9%   |
| HDAC1 H141A     | 20 ± 1.6%   |
| Wild Type HDAC1 | 100%        |
| HDAC1 V19A      | 31 ± 4.7%   |
| HDAC1 M30A      | 20 ± 6.4%   |
| HDAC1 135A      | 5.8 ± 2.1%  |
| HDAC1 R36A      | 25 ± 3.7%   |
| HDAC1 F109A     | 20 ± 2.7%   |
| HDAC1 S113A     | 62 ± 4.5%   |
| HDAC1 L139A     | 39 ± 0.9%   |
| HDAC1 Y303A     | 6.3 ± 1.7%  |

<sup>a</sup>The mean deacetylase activities for each mutant is a percent of the wild type (see to 100%) and the standard error for at least four independent trials is shown (see histogram Figure 4A in manuscript).

**Table S3.** Percent deacetylase activities for substitution mutants<sup>a</sup>

| Sample      | Mean± Error |
|-------------|-------------|
| No protein  | 10 ± 1.9%   |
| HDAC1 H141A | 20 ± 1.6%   |
| Wild Type   | 100%        |
| HDAC1 Y23F  | 12 ± 3.5%   |
| HDAC1 Y23C  | 36 ± 9.8%   |
| HDAC1 Y23H  | 12 ± 2.7%   |
| HDAC1 Y23R  | 26 ± 3.0%   |
| HDAC1 Y24F  | 50 ± 8.2%   |
| HDAC1 R34K  | 17 ± 2.8%   |
| HDAC1 R36K  | 33 ± 3.8%   |
| HDAC1 C151S | 30 ± 1.3%   |
| HDAC1 Y303F | 38 ± 6.0%   |

<sup>a</sup>The mean deacetylase activities for each mutant is a percent of the wild type (set at 100%) and the standard error of at least three independent trials is shown (Figure 5A in the manuscript).

### III. Acetate inhibition experimental data

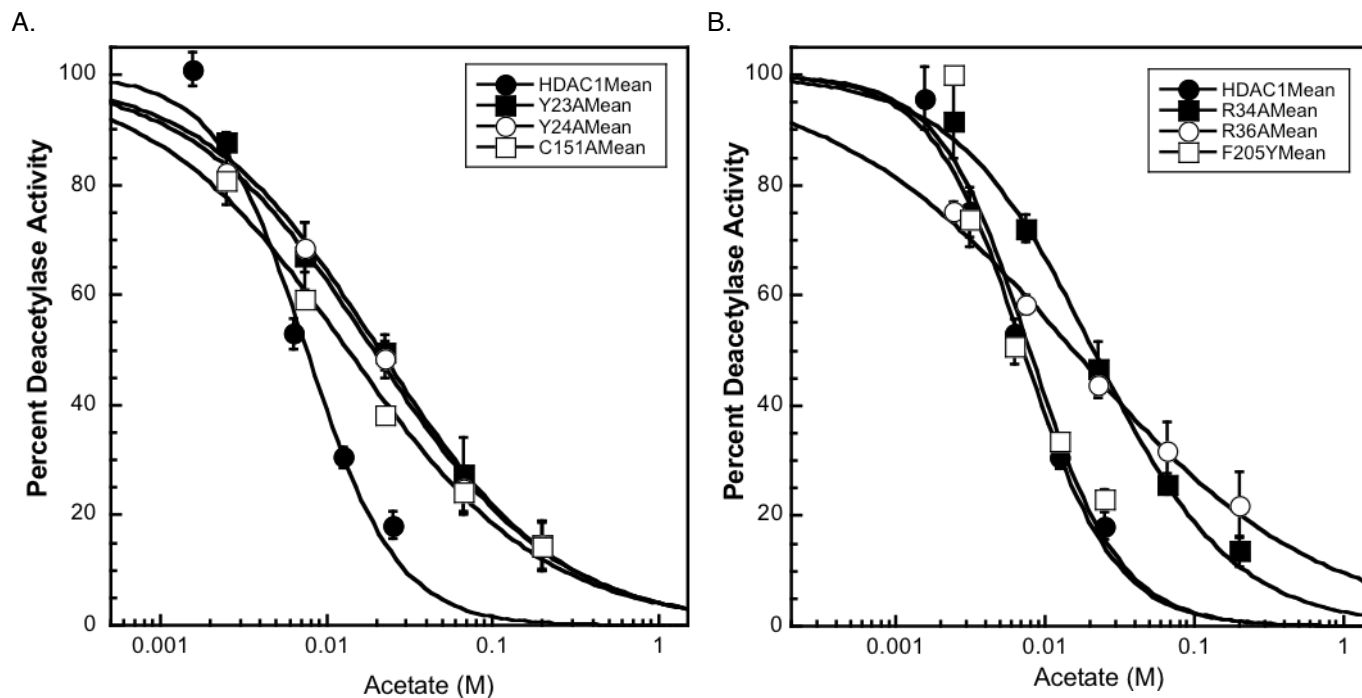

Figure S1. Dose dependent curves for acetate inhibition of wild type and mutant HDAC1. Wild type or mutant proteins were expressed in T-Ag Jurkat cells as FLAG-tagged fusion proteins, immunoprecipitated with anti-FLAG-agarose bead, and tested for catalytic activity in the absence or presence of varying concentrations of acetate (0-200mM). The standard error for at least 4 trials is shown. IC50 values derived from these curves in shown in Table 1.

Table S4. Percentage remaining HDAC activity after incubation of acetate with HDAC1

| Concentration (M)      | Mean± Error     |
|------------------------|-----------------|
| $2.5 \times 10^{-2}$   | $18 \pm 2.5 \%$ |
| $1.25 \times 10^{-2}$  | $31 \pm 2.0 \%$ |
| $6.25 \times 10^{-3}$  | $53 \pm 2.8 \%$ |
| $3.125 \times 10^{-3}$ | $75 \pm 4.5 \%$ |
| $1.56 \times 10^{-3}$  | $96 \pm 5.7 \%$ |

Table S5. Percentage remaining HDAC activity after incubation of acetate with HDAC1F205Y

| Concentration (M)      | Mean± Error     |
|------------------------|-----------------|
| $2.5 \times 10^{-2}$   | $24 \pm 1.8 \%$ |
| $1.25 \times 10^{-2}$  | $34 \pm 0.7 \%$ |
| $6.25 \times 10^{-3}$  | $51 \pm 3.2 \%$ |
| $3.125 \times 10^{-3}$ | $74 \pm 5.0 \%$ |
| $1.56 \times 10^{-3}$  | $99 \pm 1.2 \%$ |

Table S6. Percentage remaining HDAC activity after incubation of acetate with HDAC1 Y23A

| Concentration (M)     | Mean± Error     |
|-----------------------|-----------------|
| $2.0 \times 10^{-1}$  | $15 \pm 4.5 \%$ |
| $6.6 \times 10^{-2}$  | $27 \pm 6.7 \%$ |
| $2.25 \times 10^{-2}$ | $50 \pm 3.2 \%$ |
| $7.4 \times 10^{-3}$  | $67 \pm 6.1 \%$ |
| $2.46 \times 10^{-3}$ | $86 \pm 1.9 \%$ |

Table S7. Percentage remaining HDAC activity after incubation of acetate with HDAC1 Y24A

| Concentration (M)     | Mean± Error     |
|-----------------------|-----------------|
| $2.0 \times 10^{-1}$  | $15 \pm 4.4\%$  |
| $6.6 \times 10^{-2}$  | $25 \pm 4.3\%$  |
| $2.25 \times 10^{-2}$ | $48 \pm 3.4 \%$ |
| $7.4 \times 10^{-3}$  | $69 \pm 4.5 \%$ |
| $2.46 \times 10^{-3}$ | $82 \pm 1.2 \%$ |

Table S8. Percentage remaining HDAC activity after incubation of acetate with HDAC1 R34A

| Concentration (M)     | Mean± Error     |
|-----------------------|-----------------|
| $2.0 \times 10^{-1}$  | $14 \pm 2.7 \%$ |
| $6.6 \times 10^{-2}$  | $26 \pm 2.0 \%$ |
| $2.25 \times 10^{-2}$ | $47 \pm 4.8 \%$ |
| $7.4 \times 10^{-3}$  | $73 \pm 2.6 \%$ |
| $2.46 \times 10^{-3}$ | $92 \pm 6.7 \%$ |

Table S9. Percentage remaining HDAC activity after incubation of acetate with HDAC1 R36A

| Concentration (M)     | Mean± Error     |
|-----------------------|-----------------|
| $2.0 \times 10^{-1}$  | $22 \pm 6.0 \%$ |
| $6.6 \times 10^{-2}$  | $32 \pm 5.3 \%$ |
| $2.25 \times 10^{-2}$ | $44 \pm 2.3 \%$ |
| $7.4 \times 10^{-3}$  | $58 \pm 1.7 \%$ |
| $2.46 \times 10^{-3}$ | $75 \pm 1.7 \%$ |

Table S10. Percentage remaining HDAC activity after incubation of acetate with HDAC1 C151A

| Concentration (M)     | Mean± Error     |
|-----------------------|-----------------|
| $2.0 \times 10^{-1}$  | $14 \pm 4.3 \%$ |
| $6.6 \times 10^{-2}$  | $24 \pm 4.3 \%$ |
| $2.25 \times 10^{-2}$ | $38 \pm 0.3 \%$ |
| $7.4 \times 10^{-3}$  | $59 \pm 1.3 \%$ |
| $2.46 \times 10^{-3}$ | $81 \pm 4.4 \%$ |

#### IV. Compound 1 experimental data

Table S11. Percentage remaining HDAC activity after incubation of **1** with HDAC1

| Concentration (M)    | Mean± Error     |
|----------------------|-----------------|
| $2.0 \times 10^{-7}$ | $30 \pm 3.5 \%$ |
| $1.0 \times 10^{-7}$ | $36 \pm 1.1 \%$ |
| $5.0 \times 10^{-8}$ | $44 \pm 1.7 \%$ |
| $2.5 \times 10^{-8}$ | $59 \pm 5.8 \%$ |

Table S12. Percentage remaining HDAC activity after incubation of **1** with HDAC1 S113A

| Concentration (M)    | Mean± Error     |
|----------------------|-----------------|
| $4.0 \times 10^{-7}$ | $36 \pm 3.0 \%$ |
| $2.0 \times 10^{-7}$ | $53 \pm 1.6 \%$ |
| $1.0 \times 10^{-7}$ | $60 \pm 1.9 \%$ |
| $5.0 \times 10^{-8}$ | $78 \pm 2.1 \%$ |

#### V. References

1. Taunton, J., Hassig, C. A., and Schreiber, S. L. (1996) A mammalian histone deacetylase related to the yeast transcriptional regulator Rpd3p, *Science* 272, 408-411.
2. Pflum, M. K., Tong, J. K., Lane, W. S., and Schreiber, S. L. (2001) Histone deacetylase 1 phosphorylation promotes enzymatic activity and complex formation, *The Journal of biological chemistry* 276, 47733-47741.
